# Supplementary material
Source: ML conference proceedings conference paper supplement (https://proceedings.neurips.cc/paper_files/paper/2019/hash/7d6044e95a16761171b130dcb476a43e-Abstract.html)
Supplement: Supplementary file [file 7d6044e95a16761171b130dcb476a43e-Supplemental.zip]

---

# Supplementary Material for Direct Estimation of Differential Functional Graphical Models

---

**Boxin Zhao**

Department of Statistics  
The Unveristy of Chicago  
Chicago, IL 60637  
boxinz@uchicago.edu

**Y. Samuel Wang**

Booth School of Business  
The Unveristy of Chicago  
Chicago, IL 60637  
swang24@uchicago.edu

**Mladen Kolar**

Booth School of Business  
The Unveristy of Chicago  
Chicago, IL 60637  
mkolar@chicagobooth.edu

## A Derivation of optimization algorithm

In this section we derive the closed-form updates for the proximal method stated in (2.11). In particular, recall that for all  $1 \leq j, l \leq p$

$$\Delta_{jl}^{\text{new}} = \left[ (\|A_{jl}^{\text{old}}\|_F - \lambda_n \eta) / \|A_{jl}^{\text{old}}\|_F \right]_+ \times A_{jl}^{\text{old}},$$

where  $A^{\text{old}} = \Delta^{\text{old}} - \eta \nabla L(\Delta^{\text{old}})$  and  $x_+ = \max\{0, x\}$ ,  $x \in \mathbb{R}$  represents the positive part of  $x$ .

*Proof of (2.11).* Let  $A^{\text{old}} = \Delta^{\text{old}} - \eta \nabla L(\Delta^{\text{old}})$ , and let  $f_{jl}$  denote the loss decomposed over each  $j, l$  block so that

$$f_{jl}(\Delta_{jl}) = \frac{1}{2\lambda_n \eta} \|\Delta_{jl} - A_{jl}^{\text{old}}\|_F^2 + \|\Delta_{jl}\|_F, \quad (\text{A.1})$$

and

$$\Delta_{jl}^{\text{new}} = \arg \min_{\Delta_{jl} \in \mathbb{R}^{M \times M}} f_{jl}(\Delta_{jl}). \quad (\text{A.2})$$

The loss  $f_{jl}(\Delta_{jl})$  is convex, so the first order optimality condition implies that:

$$0 \in \partial f_{jl}(\Delta_{jl}^{\text{new}}), \quad (\text{A.3})$$

where  $\partial f_{jl}(\Delta_{jl})$  is the subdifferential of  $f_{jl}$  at  $\Delta_{jl}$ . Note that  $\partial f_{jl}(\Delta_{jl})$  can be expressed as:

$$\partial f_{jl}(\Delta_{jl}) = \frac{1}{\lambda_n \eta} (\Delta_{jl} - A_{jl}^{\text{old}}) + Z_{jl}, \quad (\text{A.4})$$

where

$$Z_{jl} = \begin{cases} \frac{\Delta_{jl}}{\|\Delta_{jl}\|_F} & \text{if } \Delta_{jl} \neq 0 \\ \{Z_{jl} \in \mathbb{R}^{M \times M} : \|Z_{jl}\|_F \leq 1\} & \text{if } \Delta_{jl} = 0. \end{cases} \quad (\text{A.5})$$

**Claim 1** If  $\|A_{jl}^{\text{old}}\|_F > \lambda_n \eta > 0$ , then  $\Delta_{jl}^{\text{new}} \neq 0$ .

We verify this claim by proving the contrapositive. Suppose  $\Delta_{jl}^{\text{new}} = 0$ , then by (A.3) and (A.5), there exists a  $Z_{jl} \in \mathbb{R}^{M \times M}$  such that  $\|Z_{jl}\|_F \leq 1$  and

$$0 = -\frac{1}{\lambda_n \eta} A_{jl}^{\text{old}} + Z_{jl}.$$

Thus,

$$\|A_{jl}^{\text{old}}\|_F = \|\lambda_n \eta \cdot Z_{jl}\|_F \leq \lambda_n \eta,$$

so that Claim 1 holds.

Combining Claim 1 with (A.3) and (A.5), for any  $j, l$  such that  $\|A_{jl}^{\text{old}}\|_F > \lambda_n \eta$ , we have

$$0 = \frac{1}{\lambda_n \eta} (\Delta_{jl}^{\text{new}} - A_{jl}^{\text{old}}) + \frac{\Delta_{jl}^{\text{new}}}{\|\Delta_{jl}^{\text{new}}\|_F},$$

which is solved by

$$\Delta_{jl}^{\text{new}} = \frac{\|A_{jl}^{\text{old}}\|_F - \lambda_n \eta}{\|A_{jl}^{\text{old}}\|_F} A_{jl}^{\text{old}}. \quad (\text{A.6})$$

**Claim 2** If  $\|A_{jl}^{\text{old}}\|_F \leq \lambda_n \eta$ , then  $\Delta_{jl}^{\text{new}} = 0$ .

Again, we verify the claim by proving the contrapositive. Suppose  $\Delta_{jl}^{\text{new}} \neq 0$ , then first order optimality implies the updates in (A.6). However, taking the Frobenius norm of both sides of the equation gives  $\|\Delta_{jl}^{\text{new}}\|_F = \|A_{jl}^{\text{old}}\|_F - \lambda_n \eta$  which implies that  $\|A_{jl}^{\text{old}}\|_F - \lambda_n \eta \geq 0$ .

The updates in (2.11) immediately follow from combining Claim 2 and (A.6).  $\square$

## B Proof of theoretical properties

We provide the proof of Theorem 3.1, which states that under certain conditions, our estimator consistently recovers  $E_\Delta$ . We follow the framework introduced in Negahban et al. (2012), but first introduce some necessary notation.

We use  $\otimes$  to denote the Kronecker product. For  $\Delta \in \mathbb{R}^{pM \times pM}$ , let  $\theta = \text{vec}(\Delta) \in \mathbb{R}^{p^2 M^2}$  and  $\theta^* = \text{vec}(\Delta^M)$ , where  $\Delta^M$  is defined in Section 2.2. Let  $\mathcal{G} = \{G_t\}_{t=1, \dots, N_G}$  be a set of indices, where  $N_G = p^2$  and  $G_t \subset \{1, 2, \dots, p^2 M^2\}$  is the set of indices for  $\theta$  which correspond to the  $t$ -th  $M \times M$  submatrix of  $\Delta^M$ . Thus, if  $t = (j-1)p + l$ , then  $\theta_{G_t} = \text{vec}(\Delta_{jl}) \in \mathbb{R}^{M^2}$  where  $\Delta_{jl}$  is the  $(j, l)$ -th  $M \times M$  submatrix of  $\Delta$ . Denote the group indices of  $\theta^*$  that belong to blocks corresponding to  $E_\Delta$  as  $S_G \subseteq \{1, 2, \dots, N_G\}$ . Note that we define  $S_G$  using  $E_\Delta$  and not  $E_{\Delta^M}$ , so as stated in Assumption 3.3,  $|S_G| = s$ . We further define the subspace  $\mathcal{M}$  as

$$\mathcal{M} := \{\theta \in \mathbb{R}^{p^2 M^2} \mid \theta_{G_t} = 0 \text{ for all } t \notin S_G\}, \quad (\text{B.1})$$

and its orthogonal complement with respect to the usual Euclidean inner product is

$$\mathcal{M}^\perp := \{\theta \in \mathbb{R}^{p^2 M^2} \mid \theta_{G_t} = 0 \text{ for all } t \in S_G\}. \quad (\text{B.2})$$

For a vector  $\theta$ , let  $\theta_{\mathcal{M}}$  and  $\theta_{\mathcal{M}^\perp}$  be the projection of  $\theta$  on the subspaces  $\mathcal{M}$  and  $\mathcal{M}^\perp$ , respectively. Let  $\langle \cdot, \cdot \rangle$  represent the usual Euclidean inner product. Let

$$\mathcal{R}(\theta) := \sum_{t=1}^{N_G} |\theta_{G_t}|_2 \triangleq \|\theta\|_{1,2}. \quad (\text{B.3})$$

For any  $v \in \mathbb{R}^{p^2 M^2}$ , the dual norm of  $\mathcal{R}$  is given by

$$\mathcal{R}^*(v) := \sup_{u \in \mathbb{R}^{p^2 M^2} \setminus \{0\}} \frac{\langle u, v \rangle}{\mathcal{R}(u)} = \sup_{\mathcal{R}(u) \leq 1} \langle u, v \rangle, \quad (\text{B.4})$$

and the subspace compatibility constant of  $\mathcal{M}$  with respect to  $\mathcal{R}$  is defined as

$$\Psi(\mathcal{M}) := \sup_{u \in \mathcal{M} \setminus \{0\}} \frac{\mathcal{R}(u)}{|u|_2}. \quad (\text{B.5})$$

### B.1 Proof of theorem 3.1

Let  $\sigma_{max} = \max\{|\Sigma^{X,M}|_\infty, |\Sigma^{Y,M}|_\infty\}$ . Suppose that

$$\begin{aligned} |S^{X,M} - \Sigma^{X,M}|_\infty &\leq \delta, \\ |S^{Y,M} - \Sigma^{Y,M}|_\infty &\leq \delta, \end{aligned} \quad (\text{B.6})$$

for some appropriate choice of  $\delta$ . Then

$$|(S^{Y,M} \otimes S^{X,M}) - (\Sigma^{Y,M} \otimes \Sigma^{X,M})|_\infty \leq \delta^2 + 2\delta\sigma_{max}, \quad (\text{B.7})$$

and

$$|\text{vec}(S^{Y,M} - S^{X,M}) - \text{vec}(\Sigma^{Y,M} - \Sigma^{X,M})|_\infty \leq 2\delta. \quad (\text{B.8})$$

Because by assumption  $\lim_{M \rightarrow \infty} \nu(M) = 0$ , there exists some  $M$  large enough so that  $2\nu(M) < \tau$ , for  $\tau$  defined in Assumption 3.2. In particular, we suppose for such  $M$ , that  $\delta < \frac{1}{4} \sqrt{\frac{\lambda_{min}^* + 16M^2 s(\sigma_{max})^2}{M^2 s}} - \sigma_{max}$ . Later, we show using Lemma C.2 that this occurs with high probability for large  $n$ .

Problem (2.7) can be written in following form:

$$\hat{\theta}_{\lambda_n} \in \arg \min_{\theta \in \mathbb{R}^{p^2 M^2}} \mathcal{L}(\theta) + \lambda_n \mathcal{R}(\theta), \quad (\text{B.9})$$

where

$$\mathcal{L}(\theta) = \frac{1}{2} \theta^T (S^{Y,M} \otimes S^{X,M}) \theta - \theta^T \text{vec}(S^{Y,M} - S^{X,M}). \quad (\text{B.10})$$

The loss  $\mathcal{L}(\theta)$  is convex and differentiable with respect to  $\theta$ , and it can be easily verified that  $\mathcal{R}(\cdot)$  defines a vector norm. For  $h \in \mathbb{R}^{p^2 M^2}$ , the error of the first-order Taylor series expansion of  $\mathcal{L}$  is:

$$\begin{aligned}\delta\mathcal{L}(h, \theta^*) &:= \mathcal{L}(\theta^* + h) - \mathcal{L}(\theta^*) - \langle \nabla\mathcal{L}(\theta^*), h \rangle \\ &= \frac{1}{2}h^T (S^{Y,M} \otimes S^{X,M})h.\end{aligned}\tag{B.11}$$

Using the form of (B.10), we see that  $\nabla\mathcal{L}(\theta) = (S^{Y,M} \otimes S^{X,M})\theta - \text{vec}(S^{Y,M} - S^{X,M})$ , and by Lemma C.1, we have

$$\mathcal{R}^*(\nabla\mathcal{L}(\theta^*)) = \max_{t=1,2,\dots,N_G} \left\| [(S^{Y,M} \otimes S^{X,M})\theta^* - \text{vec}(S^{Y,M} - S^{X,M})]_{G_t} \right\|_2. \tag{B.12}$$

We now show an upper bound for  $\mathcal{R}^*(\nabla\mathcal{L}(\theta^*))$ . First, note that

$$(\Sigma^{Y,M} \otimes \Sigma^{X,M})\theta^* - \text{vec}(\Sigma^{Y,M} - \Sigma^{X,M}) = \text{vec}(\Sigma^{X,M} \Delta^M \Sigma^{Y,M} - (\Sigma^{Y,M} - \Sigma^{X,M})) = 0.$$

Letting  $(\cdot)_{jl}$  denote the  $(j, l)$ -th submatrix, we have

$$\begin{aligned}& \left\| [(S^{Y,M} \otimes S^{X,M})\theta^* - \text{vec}(S^{Y,M} - S^{X,M})]_{G_t} \right\|_2 \\ &= \left\| [(S^{Y,M} \otimes S^{X,M} - \Sigma^{Y,M} \otimes \Sigma^{X,M})\theta^* - \text{vec}((S^{Y,M} - \Sigma^{Y,M}) - (S^{X,M} - \Sigma^{X,M}))]_{G_t} \right\|_2 \\ &\leq \| (S^{X,M} \Delta^M S^{Y,M} - \Sigma^{X,M} \Delta^M \Sigma^{Y,M})_{jl} - (S^{Y,M} - \Sigma^{Y,M})_{jl} - (S^{X,M} - \Sigma^{X,M})_{jl} \|_F \\ &\leq \| (S^{X,M} \Delta^M S^{Y,M} - \Sigma^{X,M} \Delta^M \Sigma^{Y,M})_{jl} \|_F + \| (S^{Y,M} - \Sigma^{Y,M})_{jl} \|_F + \| (S^{X,M} - \Sigma^{X,M})_{jl} \|_F.\end{aligned}\tag{B.13}$$

For any  $M \times M$  matrix  $A$ ,  $\|A\|_F \leq M\|A\|_\infty$ , so

$$\begin{aligned}& \left\| [(S^{Y,M} \otimes S^{X,M})\theta^* - \text{vec}(S^{Y,M} - S^{X,M})]_{G_t} \right\|_2 \\ &\leq M \left[ \| (S^{X,M} \Delta^M S^{Y,M} - \Sigma^{X,M} \Delta^M \Sigma^{Y,M})_{jl} \|_\infty + \| (S^{Y,M} - \Sigma^{Y,M})_{jl} \|_\infty \right. \\ &\quad \left. + \| (S^{X,M} - \Sigma^{X,M})_{jl} \|_\infty \right] \\ &\leq M \left[ \| S^{X,M} \Delta^M S^{Y,M} - \Sigma^{X,M} \Delta^M \Sigma^{Y,M} \|_\infty + \| S^{Y,M} - \Sigma^{Y,M} \|_\infty + \| S^{X,M} - \Sigma^{X,M} \|_\infty \right].\end{aligned}$$

Now, note that for any  $A \in \mathbb{R}^{k \times k}$  and  $v \in \mathbb{R}^k$ , we have  $|Av|_\infty \leq \|A\|_\infty \|v\|_1$ , thus we further have

$$\begin{aligned}\| S^{X,M} \Delta^M S^{Y,M} - \Sigma^{X,M} \Delta^M \Sigma^{Y,M} \|_\infty &= \| [(S^{Y,M} \otimes S^{X,M}) - (\Sigma^{X,M} \otimes \Sigma^{Y,M})] \text{vec}(\Delta^M) \|_\infty \\ &\leq \| (S^{Y,M} \otimes S^{X,M}) - (\Sigma^{X,M} \otimes \Sigma^{Y,M}) \|_\infty \| \text{vec}(\Delta^M) \|_1 \\ &= \| (S^{Y,M} \otimes S^{X,M}) - (\Sigma^{X,M} \otimes \Sigma^{Y,M}) \|_\infty \|\Delta^M\|_1.\end{aligned}$$

Combining the inequalities gives an upper bound uniform over  $\mathcal{G}$  (i.e., for all  $G_t$ ):

$$\begin{aligned}& \left\| [(S^{Y,M} \otimes S^{X,M})\theta^* - \text{vec}(S^{Y,M} - S^{X,M})]_{G_t} \right\|_2 \\ &\leq M \left[ \| (S^{Y,M} \otimes S^{X,M}) - (\Sigma^{X,M} \otimes \Sigma^{Y,M}) \|_\infty \|\Delta^M\|_1 + \| S^{Y,M} - \Sigma^{Y,M} \|_\infty \right. \\ &\quad \left. + \| S^{X,M} - \Sigma^{X,M} \|_\infty \right],\end{aligned}$$

which implies

$$\begin{aligned}\mathcal{R}^*(\nabla\mathcal{L}(\theta^*)) &\leq M \left[ \| (S^{Y,M} \otimes S^{X,M}) - (\Sigma^{X,M} \otimes \Sigma^{Y,M}) \|_\infty \|\Delta^M\|_1 + \| S^{Y,M} - \Sigma^{Y,M} \|_\infty \right. \\ &\quad \left. + \| S^{X,M} - \Sigma^{X,M} \|_\infty \right].\end{aligned}\tag{B.14}$$

Assuming  $\| S^{X,M} - \Sigma^{X,M} \|_\infty \leq \delta$  and  $\| S^{Y,M} - \Sigma^{Y,M} \|_\infty \leq \delta$  implies

$$\mathcal{R}^*(\nabla\mathcal{L}(\theta^*)) \leq M[(\delta^2 + 2\delta\sigma_{max})\|\Delta^M\|_1 + 2\delta], \tag{B.15}$$

where  $0 < \delta \leq c_1$ .

Setting

$$\lambda_n = 2M \left[ (\delta^2 + 2\delta\sigma_{max}) \|\Delta^M\|_1 + 2\delta \right], \quad (\text{B.16})$$

then implies that  $\lambda_n \geq 2\mathcal{R}^*(\nabla\mathcal{L}(\theta^*))$ . Thus, invoking Lemma 1 in Negahban et al. (2012),  $h = \hat{\theta}_{\lambda_n} - \theta^*$  must satisfy

$$\mathcal{R}(h_{\mathcal{M}^\perp}) \leq 3\mathcal{R}(h_{\mathcal{M}}) + 4\mathcal{R}(\theta_{\mathcal{M}^\perp}^*), \quad (\text{B.17})$$

where  $\mathcal{M}$  is defined in (B.1). Equivalently,

$$\|h_{\mathcal{M}^\perp}\|_{1,2} \leq 3\|h_{\mathcal{M}}\|_{1,2} + 4\|\theta_{\mathcal{M}^\perp}^*\|_{1,2}. \quad (\text{B.18})$$

By the definition of  $\nu$  in Assumption 3.2, we have

$$\|\theta_{\mathcal{M}^\perp}^*\|_{1,2} = \sum_{t \notin \mathcal{S}_G} \|\theta_{G_t}^*\|_2 \leq (p(p+1)/2 - s)\nu \leq p^2\nu. \quad (\text{B.19})$$

Next, we show that  $\delta\mathcal{L}(h, \theta^*)$ , as defined in (B.11), satisfies the Restricted Strong Convexity property defined in definition 2 in Negahban et al. (2012). That is, we show an inequality of the form:  $\delta\mathcal{L}(h, \theta^*) \geq \kappa_{\mathcal{L}}|h|_2^2 - \omega_{\mathcal{L}}^2(\theta^*)$  whenever  $h$  satisfies (B.18).

By using Lemma C.3, we have

$$\begin{aligned} \theta^T(S^{Y,M} \otimes S^{X,M})\theta &= \theta^T(\Sigma^{Y,M} \otimes \Sigma^{X,M})\theta + \theta^T(S^{Y,M} \otimes S^{X,M} - \Sigma^{Y,M} \otimes \Sigma^{X,M})\theta \\ &\geq \theta^T(\Sigma^{Y,M} \otimes \Sigma^{X,M})\theta - |\theta^T(S^{Y,M} \otimes S^{X,M} - \Sigma^{Y,M} \otimes \Sigma^{X,M})\theta| \\ &\geq \lambda_{min}^*|\theta|_2^2 - M^2|S^{Y,M} \otimes S^{X,M} - \Sigma^{Y,M} \otimes \Sigma^{X,M}|_\infty\|\theta\|_{1,2}^2, \end{aligned}$$

where the last inequality holds because Lemma C.3 and  $\lambda_{min}^* = \lambda_{min}(\Sigma^{X,M}) \times \lambda_{min}(\Sigma^{Y,M}) = \lambda_{min}(\Sigma^{Y,M} \otimes \Sigma^{X,M}) > 0$ . Thus,

$$\begin{aligned} \delta\mathcal{L}(h, \theta^*) &= \frac{1}{2}h^T(S^{Y,M} \otimes S^{X,M})h \\ &\geq \frac{1}{2}\lambda_{min}^*|h|_2^2 - \frac{1}{2}M^2|S^{Y,M} \otimes S^{X,M} - \Sigma^{Y,M} \otimes \Sigma^{X,M}|_\infty\|h\|_{1,2}^2. \end{aligned}$$

By Lemma C.4 and (B.18), we have

$$\begin{aligned} \|h\|_{1,2}^2 &= (\|h_{\mathcal{M}}\|_{1,2} + \|h_{\mathcal{M}^\perp}\|_{1,2})^2 \\ &\leq 16(\|h_{\mathcal{M}}\|_{1,2} + \|\theta_{\mathcal{M}^\perp}^*\|_{1,2})^2 \\ &\leq 16(\sqrt{s}\|h\|_2 + p^2\nu)^2 \\ &\leq 32s\|h\|_2^2 + 32p^2\nu. \end{aligned}$$

Combining with the equation above, we get

$$\begin{aligned} \delta\mathcal{L}(h, \theta^*) &\geq \left[ \frac{1}{2}\lambda_{min}^* - 16M^2s|S^{Y,M} \otimes S^{X,M} - \Sigma^{Y,M} \otimes \Sigma^{X,M}|_\infty \right] |h|_2^2 \\ &\quad - 16M^2p^4\nu^2|S^{Y,M} \otimes S^{X,M} - \Sigma^{Y,M} \otimes \Sigma^{X,M}|_\infty \\ &\geq \left[ \frac{1}{2}\lambda_{min}^* - 8M^2s(\delta_1\delta_2 + \delta_2\sigma_{max} + \delta_1\sigma_{max}^Y) \right] |h|_2^2 \\ &\quad - 16M^2p^4\nu^2(\delta_1\delta_2 + \delta_2\sigma_{max} + \delta_1\sigma_{max}^Y). \end{aligned} \quad (\text{B.20})$$

Thus, appealing to (B.7), the Restricted Strong Convexity property holds with

$$\begin{aligned}\kappa_{\mathcal{L}} &= \frac{1}{2}\lambda_{min}^* - 8M^2s(\delta^2 + 2\delta\sigma_{max}), \\ \omega_{\mathcal{L}} &= 4Mp^2\nu\sqrt{\delta^2 + 2\delta\sigma_{max}}.\end{aligned}\tag{B.21}$$

When  $\delta < \frac{1}{4}\sqrt{\frac{\lambda_{min}^* + 16M^2s(\sigma_{max})^2}{M^2s}} - \sigma_{max}$  then  $\kappa_{\mathcal{L}} > 0$ . By Theorem 1 of Negahban et al. (2012) and Lemma C.4, letting  $\lambda_n = 2M[(\delta^2 + 2\delta\sigma_{max})|\Delta^M|_1 + 2\delta]$ , as in (B.16), ensures

$$\begin{aligned}\|\hat{\Delta}^M - \Delta^M\|_F^2 &= \|\hat{\theta}_{\lambda_n} - \theta^*\|_2^2 \\ &\leq 9\frac{\lambda_n^2}{\kappa_{\mathcal{L}}^2}\Psi^2(\mathcal{M}) + \frac{\lambda_n}{\kappa_{\mathcal{L}}}(2\omega_{\mathcal{L}}^2 + 4\mathcal{R}(\theta_{\mathcal{M}^\perp}^*)) \\ &= \frac{9\lambda_n^2s}{\kappa_{\mathcal{L}}^2} + \frac{2\lambda_n}{\kappa_{\mathcal{L}}}(\omega_{\mathcal{L}}^2 + 2p^2\nu) \\ &:= \Gamma.\end{aligned}\tag{B.22}$$

Note that  $\Gamma$  is function of  $\delta$  through  $\lambda_n$  (defined in (B.16)),  $\kappa_{\mathcal{L}}$ , and  $\omega_{\mathcal{L}}$ . For fixed  $M$ ,  $\nu(M)$  and  $p$ ,  $k \rightarrow 0$  as  $\delta \rightarrow 0$ , so there exists a  $\delta_0 > 0$  such that  $\delta < \delta_0$  implies

$$\begin{aligned}\Gamma &< (1/2)\tau - \nu, \\ \delta &< \min\left\{\frac{1}{4}\sqrt{\frac{\lambda_{min}^* + 16M^2s(\sigma_{max})^2}{M^2s}} - \sigma_{max}, c_1\right\},\end{aligned}\tag{B.23}$$

for any  $c_1 > 0$ . When these hold, there exists an

$$\epsilon_n \in (\Gamma + \nu, \tau - (\Gamma + \nu)),\tag{B.24}$$

and when thresholding with this  $\epsilon_n$  we claim  $\hat{E}_{\Delta^M} = E_{\Delta}$ . We prove this claim below.

Note that we have  $\|\hat{\Delta}_{jl} - \Delta_{jl}^M\|_F \leq \|\hat{\Delta} - \Delta^M\|_F \leq \Gamma$  for any  $(j, l) \in V^2$ . Recall that

$$E_{\Delta} = \{(j, l) \in V^2 : \|C_{jl}^{\Delta}\|_{\text{HS}} > 0, j \neq l\}.\tag{B.25}$$

We first prove that  $E_{\Delta} \subseteq \hat{E}_{\Delta^M}$ . For any  $(j, l) \in E_{\Delta}$ , by the definition of  $\nu$  and  $\tau$  in Assumption 3.2, we have  $\|C_{jl}^{\Delta}\|_{\text{HS}} \geq \tau$  and  $\|\Delta_{jl}^M\|_F \geq \|C_{jl}^{\Delta}\|_{\text{HS}} - \nu$ . Thus, we have

$$\begin{aligned}\|\hat{\Delta}_{jl}\|_F &\geq \|\Delta_{jl}^M\|_F - \|\hat{\Delta}_{jl} - \Delta_{jl}^M\|_F \\ &\geq \|C_{jl}^{\Delta}\|_{\text{HS}} - \|\hat{\Delta}_{jl} - \Delta_{jl}^M\|_F - \nu \\ &\geq \tau - \Gamma - \nu \\ &> \epsilon_n.\end{aligned}$$

The last inequality holds because we have assumed that  $\epsilon_n \in (\Gamma + \nu(M), \tau - (\Gamma + \nu(M)))$ . Thus, by definition of  $\hat{E}_{\Delta^M}$  shown in (2.9), we have  $(j, l) \in \hat{E}_{\Delta^M}$  which further implies that  $E_{\Delta} \subseteq \hat{E}_{\Delta^M}$ .

We then show  $\hat{E}_{\Delta^M} \subseteq E_{\Delta}$ . Let  $\hat{E}_{\Delta^M}^c$  and  $E_{\Delta}^c$  denote the complement set of  $\hat{E}_{\Delta^M}$  and  $E_{\Delta}$ . For any  $(j, l) \in E_{\Delta}^c$ , which also means that  $(l, j) \in E_{\Delta}^c$ , by (B.25), we have  $\|C_{jl}^{\Delta}\|_{\text{HS}} = 0$ , thus

$$\begin{aligned}\|\hat{\Delta}_{jl}\|_F &\leq \|\Delta_{jl}^M\|_F + \|\hat{\Delta}_{jl} - \Delta_{jl}^M\|_F \\ &\leq \|C_{jl}^{\Delta}\|_{\text{HS}} + \|\hat{\Delta}_{jl} - \Delta_{jl}^M\|_F + \nu \\ &\leq \Gamma + \nu \\ &< \epsilon_n.\end{aligned}$$

Again, the last inequality holds because we have assumed that  $\epsilon_n$  satisfies (B.24). Thus, by definition of  $\hat{E}_{\Delta^M}$ , we have  $(j, l) \notin \hat{E}_{\Delta^M}$  or  $(j, l) \in \hat{E}_{\Delta^M}^c$ . This implies that  $E_{\Delta}^c \subseteq \hat{E}_{\Delta^M}^c$ , or  $\hat{E}_{\Delta^M} \subseteq E_{\Delta}$ . Combing with previous conclusion that  $E_{\Delta} \subseteq \hat{E}_{\Delta^M}$ , the proof is complete.

We now show that for any  $\delta$ , there exists some  $n$  large enough so that, (B.6), (B.7) and (B.8) occur with high probability. In particular, let

$$\delta = \frac{1}{\sqrt{c_1}} M^{1+\beta_x} \sqrt{\frac{2(\log p + \log M + \log n)}{n}}, \quad (\text{B.26})$$

where  $\lim_{n \rightarrow \infty} \delta(n) = 0$ . Thus, there exists some  $n$  large enough such that  $\delta_0 = \delta(n)$  satisfies (B.23). Then, Lemma C.2 implies that there exists some  $c_1, c_2$  such that (B.6), (B.7) and (B.8) holds for  $\delta < c_1$  with probability  $1 - 2c_2/n^2$ .

## C Lemmas in the proof of theoretical properties

**Lemma C.1.** For  $\mathcal{R}(\cdot)$  norm defined in (B.3), its dual norm  $\mathcal{R}^*(\cdot)$ , defined in (B.4), is

$$\mathcal{R}^*(v) = \max_{t=1, \dots, N_G} |v_{G_t}|_2. \quad (\text{C.1})$$

*Proof.* For any  $u : \|u\|_{1,2} \leq 1$  and  $v \in \mathbb{R}^{p^2 M^2}$ , we have

$$\begin{aligned} \langle v, u \rangle &= \sum_{t=1}^{N_G} \langle v_{G_t}, u_{G_t} \rangle \\ &\leq \sum_{t=1}^{N_G} |v_{G_t}|_2 |u_{G_t}|_2 \\ &\leq \left( \max_{t=1, 2, \dots, N_G} |v_{G_t}|_2 \right) \sum_{t=1}^{N_G} |u_{G_t}|_2 \\ &= \left( \max_{t=1, 2, \dots, N_G} |v_{G_t}|_2 \right) \|u\|_{1,2} \\ &\leq \max_{t=1, 2, \dots, N_G} |v_{G_t}|_2. \end{aligned}$$

To complete the proof, we to show that this upper bound can be obtained. Let  $t^* = \arg \max_{t=1, 2, \dots, N_G} |v_{G_t}|_2$ , and select  $u$  such that

$$\begin{aligned} u_{G_t} &= 0 & \forall t \neq t^*, \\ u_{G_t} &= \frac{v_{G_{t^*}}}{|v_{G_{t^*}}|_2} & t = t^*. \end{aligned}$$

It follows that  $\|u\|_{1,2} = 1$  and  $\langle v, u \rangle = |v_{G_{t^*}}|_2 = \max_{t=1, \dots, N_G} |v_{G_t}|_2$ .  $\square$

**Lemma C.2.** Let

$$f(n, p, M, \delta, \beta, c_1, c_2) = c_2 p^2 M^2 \exp \left\{ -c_1 n M^{-(2+2\beta)} \delta^2 \right\}, \quad (\text{C.2})$$

$\beta = \min\{\beta_X, \beta_Y\}$  where  $\beta_X$  and  $\beta_Y$  are as defined in Assumption 3.1, and  $\sigma_{max} = \max\{\sigma_{max}^X, \sigma_{max}^Y\}$  where  $\sigma_{max}^X$  and  $\sigma_{max}^Y$  are as defined in Section 3.

There exists positive constants,  $c_1$  and  $c_2$ , such that for  $0 < \delta < c_1$ , with probability at least  $1 - 2f(\min\{n_X, n_Y\}, p, M, \delta, \beta, c_1, c_2)$  the following statements hold simultaneously:

$$\begin{aligned} |S^{X,M} - \Sigma^{X,M}|_\infty &\leq \delta, \\ |S^{Y,M} - \Sigma^{Y,M}|_\infty &\leq \delta, \end{aligned} \quad (\text{C.3})$$

$$|(S^{Y,M} \otimes S^{X,M}) - (\Sigma^{Y,M} \otimes \Sigma^{X,M})|_\infty \leq \delta^2 + 2\delta\sigma_{max}, \quad (\text{C.4})$$

and

$$|\text{vec}(S^{Y,M} - S^{X,M}) - \text{vec}(\Sigma^{Y,M} - \Sigma^{X,M})|_\infty \leq 2\delta. \quad (\text{C.5})$$

*Proof.* Denote the  $(j, l)$ -th  $M \times M$  submatrix of  $S^{X,M}$  by  $S_{jl}^{X,M}$  and the  $(k, m)$ -th entry of  $S_{jl}^{X,M}$  by  $\hat{\sigma}_{jl,km}^{X,M}$  for  $j, l = 1, \dots, p$  and  $k, m = 1, \dots, M$ . We use similar notation for  $\Sigma^{X,M}$ ,  $S^{Y,M}$ , and  $\Sigma^{Y,M}$ .

The statement in (C.3) holds directly by applying Theorem 1 in Qiao et al. (2019) to  $S^{X,M}$  and  $S^{Y,M}$  and combining the statements with a union bound.



To show (C.4), note that (C.3) then implies

$$\begin{aligned}
|\hat{\sigma}_{jl,km}^{X,M} \hat{\sigma}_{j'l',k'm'}^{Y,M} - \Sigma_{jl,km}^{X,M} \Sigma_{j'l',k'm'}^{Y,M}| &\leq |\hat{\sigma}_{jl,km}^{X,M} - \Sigma_{jl,km}^{X,M}| |\hat{\sigma}_{j'l',k'm'}^{Y,M} - \Sigma_{j'l',k'm'}^{Y,M}| \\
&\quad + |\hat{\sigma}_{jl,km}^{X,M}| |\hat{\sigma}_{j'l',k'm'}^{Y,M} - \Sigma_{j'l',k'm'}^{Y,M}| \\
&\quad + |\hat{\sigma}_{j'l',k'm'}^{Y,M}| |\hat{\sigma}_{jl,km}^{X,M} - \Sigma_{jl,km}^{X,M}| \\
&\leq |S^{X,M} - \Sigma^{X,M}|_{\infty} |S^{Y,M} - \Sigma^{Y,M}|_{\infty} \\
&\quad + \sigma_{max} |S^{Y,M} - \Sigma^{Y,M}|_{\infty} + \sigma_{max} |S^{X,M} - \Sigma^{X,M}|_{\infty} \\
&\leq \delta^2 + 2\delta\sigma_{max}.
\end{aligned}$$

For (C.5), note that

$$\begin{aligned}
|\text{vec}(S^{Y,M} - S^{X,M}) - \text{vec}(\Sigma^{Y,M} - \Sigma^{X,M})|_{\infty} &= |(S^{X,M} - \Sigma^{X,M}) - (S^{Y,M} - \Sigma^{Y,M})|_{\infty} \\
&\leq |S^{X,M} - \Sigma^{X,M}|_{\infty} + |S^{Y,M} - \Sigma^{Y,M}|_{\infty} \\
&\leq 2\delta.
\end{aligned}$$

□

**Lemma C.3.** For a set of indices  $\mathcal{G} = \{G_t\}_{t=1,\dots,N_G}$ , suppose  $\|\cdot\|_{1,2}$  is defined in (B.3). Then for any matrix  $A \in \mathbb{R}^{p^2 M^2 \times p^2 M^2}$  and  $\theta \in \mathbb{R}^{p^2 M^2}$

$$|\theta^T A \theta| \leq M^2 |A|_{\infty} \|\theta\|_{1,2}^2. \quad (\text{C.6})$$

*Proof.*

$$\begin{aligned}
|\theta^T A \theta| &= \left| \sum_i \sum_j A_{ij} \theta_i \theta_j \right| \\
&\leq \sum_i \sum_j |A_{ij} \theta_i \theta_j| \\
&\leq |A|_{\infty} \left( \sum_i |\theta_i| \right)^2 \\
&= |A|_{\infty} \left( \sum_{t=1}^{N_G} \sum_{k \in G_t} |\theta_k| \right)^2 \\
&= |A|_{\infty} \left( \sum_{t=1}^{N_G} \|\theta_{G_t}\|_1 \right)^2 \\
&\leq |A|_{\infty} \left( \sum_{t=1}^{N_G} M \|\theta_{G_t}\|_2 \right)^2 \\
&= M^2 |A|_{\infty} \|\theta\|_{1,2}^2.
\end{aligned}$$

In the penultimate line, we use the property that for any vector  $v \in \mathbb{R}^n$ ,  $|v|_1 \leq \sqrt{n}|v|_2$ . □

**Lemma C.4.** Suppose  $\mathcal{M}$  is defined as in (B.1). For any  $\theta \in \mathcal{M}$ , we have  $\|\theta\|_{1,2} \leq \sqrt{s}|\theta|_2$ . Furthermore, for  $\Psi(\mathcal{M})$  as defined in (B.5), we have  $\Psi(\mathcal{M}) = \sqrt{s}$ .

*Proof.* By definition of  $\mathcal{M}$  and  $\|\cdot\|_{1,2}$ , we have

$$\begin{aligned}
\|\theta\|_{1,2} &= \sum_{t \in S_G} |\theta_{G_t}|_2 + \sum_{t \notin S_G} |\theta_{G_t}|_2 \\
&= \sum_{t \in S_G} |\theta_{G_t}|_2 \\
&\leq \sqrt{s} \left( \sum_{t \in S_G} |\theta_{G_t}|_2^2 \right)^{\frac{1}{2}} \\
&= \sqrt{s} |\theta|_2.
\end{aligned}$$

In the penultimate line, we appeal to the Cauchy-Schwartz inequality. To show  $\Psi(\mathcal{M}) = \sqrt{s}$ , it suffices to show that the upper bound above can be achieved. Select  $\theta \in \mathbb{R}^{p^2 M^2}$  such that  $|\theta_{G_t}|_2 = c$ ,  $\forall t \in S_G$ , where  $c$  is some positive constant. This implies that  $\|\theta\|_{1,2} = sc$  and  $|\theta|_2 = \sqrt{sc}$  so that  $\|\theta\|_{1,2} = \sqrt{s} |\theta|_2$ . Thus,  $\Psi(\mathcal{M}) = \sqrt{s}$ . □

## D More simulation results

### D.1 AUC table of simulations in section 4.1

Table 1: The mean area under the ROC curves. Standard errors are shown in parentheses.

|     | FuDGE       | AIC         | BIC     | Multiple    |
|-----|-------------|-------------|---------|-------------|
| $p$ | Model1      |             |         |             |
| 30  | 0.99 (0.01) | 0.75 (0.17) | 0.5 (0) | 0.71 (0.11) |
| 60  | 0.91 (0.06) | 0.5 (0)     | 0.5 (0) | 0.56 (0.1)  |
| 90  | 0.82 (0.1)  | 0.5(0)      | 0.5 (0) | 0.55 (0.09) |
| 120 | 0.64 (0.06) | 0.5(0)      | 0.5 (0) | 0.53 (0.04) |
| $p$ | Model2      |             |         |             |
| 30  | 0.9 (0.08)  | 0.59 (0.06) | 0.5 (0) | 0.53 (0.14) |
| 60  | 0.9 (0.07)  | 0.5 (0)     | 0.5 (0) | 0.48 (0.11) |
| 90  | 0.88 (0.08) | 0.5(0)      | 0.5 (0) | 0.46 (0.08) |
| 120 | 0.86 (0.07) | 0.5(0)      | 0.5 (0) | 0.46 (0.12) |
| $p$ | Model3      |             |         |             |
| 30  | 0.87 (0.06) | 0.69 (0.06) | 0.5 (0) | 0.83 (0.08) |
| 60  | 0.83 (0.09) | 0.58 (0.07) | 0.5 (0) | 0.77 (0.09) |
| 90  | 0.74 (0.1)  | 0.5(0)      | 0.5 (0) | 0.57 (0.1)  |
| 120 | 0.74 (0.08) | 0.5(0.02)   | 0.5 (0) | 0.55 (0.05) |

### D.2 AUC table of simulations in section 4.2

Table 2: The mean area under the ROC curves of example that multiple network strategy works better. Standard errors are shown in parentheses

| $p$ | FuDGE       | Multiple    |
|-----|-------------|-------------|
| 30  | 0.99 (0)    | 1 (0)       |
| 60  | 0.98 (0.01) | 1 (0)       |
| 90  | 0.87 (0.09) | 1 (0.01)    |
| 120 | 0.73 (0.12) | 0.94 (0.09) |

## References

- S. N. Negahban, P. Ravikumar, M. J. Wainwright, and B. Yu. A unified framework for high-dimensional analysis of  $m$ -estimators with decomposable regularizers. *Stat. Sci.*, 27(4):538–557, 2012.
- X. Qiao, S. Guo, and G. M. James. Functional Graphical Models. *J. Amer. Statist. Assoc.*, 114(525):211–222, 2019.
